# Supplementary material for: The selective laser sintering of a polyamide 11/BaTiO3/graphene ternary piezoelectric nanocomposite
Source: Royal Society of Chemistry journal article supplement (doi:10.1039/d0ra01042a), 2020-01-01
Supplement: d0ra01042a1.pdf [file d0ra01042a1.pdf]

## ***Supplementary Information***

### **The Selective Laser Sintering of Polyamide 11 /BaTiO<sub>3</sub> /Graphene Ternary Piezoelectric Nanocomposite**

Yipu Jin <sup>a</sup>, Ning Chen <sup>a</sup>, Yijun Li <sup>a</sup>, Qi Wang <sup>a,\*</sup>

<sup>a</sup> *State Key Laboratory of Polymer Materials Engineering, Polymer Research Institute, Sichuan University, Chengdu, 610065, China*

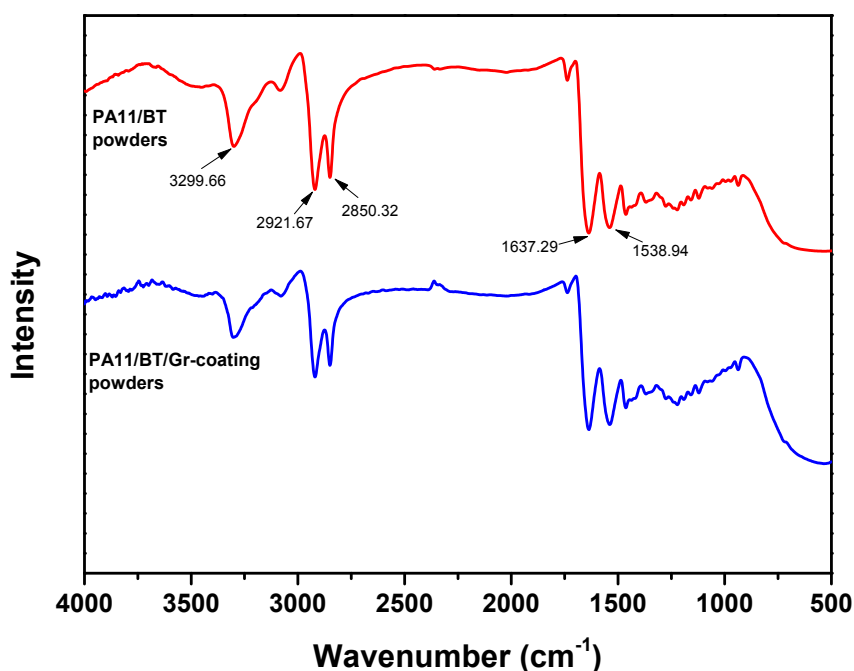

**Fig. S1.** The FT-IR spectra of the composite powder.

To explore the structure interaction between graphene PA11/BaTiO<sub>3</sub> composite powder during the ultrasonic coating process, we conducted the FT-IR measurement. Fig. S1. shows the infrared spectra of PA11/BT powders and PA11/BT/Gr-coating powders, from 500 to 4000 cm<sup>-1</sup>. The result showed that there was no obvious chemical interaction occurring between graphene and PA11/BaTiO<sub>3</sub> composite, as the characteristic peaks of PA11 (Amide I :  $\nu=1637,29$  cm<sup>-1</sup>, Amide II :  $\nu=1538.94$  cm<sup>-1</sup>, -NH:  $\nu=3299.66$ cm<sup>-1</sup>, -CH<sub>2</sub>: stretching vibrations  $\nu=2921.67$ cm<sup>-1</sup>,  $\nu=2850.32$ cm<sup>-1</sup>) do not shift and change after incorporating graphene. During the agitating process, the graphene dispersed in ethanol solution under ultrasonication and gradually deposited onto the surface of PA11/BT powders. The interaction between graphene and the composite powders was the van der Waals forces interfacial adhesion due to electrostatic interactions<sup>1-3</sup>.

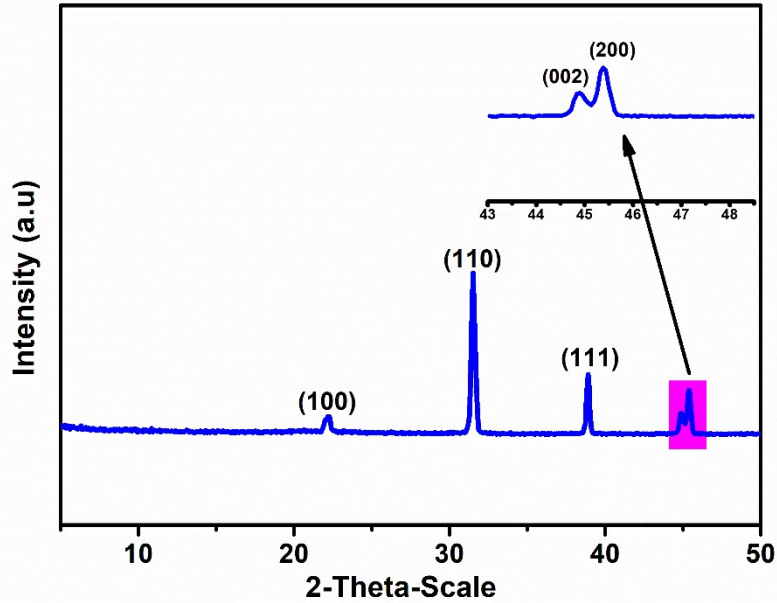

**Fig. S2.** X-ray diffraction patterns of the PA11/BT/Gr-coating parts. The inset is the detailed view from the peak highlighted in the full patterns.

BaTiO<sub>3</sub> has multiple Curie points and complex phase transition behavior. The crystal structure is not only related to temperature, but also to the particle size of the powder<sup>4</sup>. From Fig. 3(a) and its detailed descriptions, we have proved that the BaTiO<sub>3</sub> nanoparticles in the PA11/BT/Gr-coating powders exhibited typical tetragonal structures. To explore the crystalline development of BaTiO<sub>3</sub> during the heating and cooling process of SLS, XRD measurements of PA11/BT/Gr-coating parts were made as shown in Fig. S2. The XRD patterns showed four diffraction peaks in an angle ( $2\theta$ ) ranging from 5° to 50°, which could be attributed to the (100), (110), (111) and (200) reflections of perovskite BaTiO<sub>3</sub><sup>5</sup>. There was a splitting of the (200) reflection in the tetragonal form, with the lower angle shoulder indexed as (002)<sup>6</sup>, indicating the BaTiO<sub>3</sub> nanoparticles in the PA11/BT/Gr-coating parts with an excellent ferroelectric tetragonal phase. Therefore, the BaTiO<sub>3</sub> nanoparticles still showed ferroelectric properties after SLS process.

## References

1. H. Pang, T. Chen, G. Zhang, B. Zeng and Z.-M. Li, *Materials Letters*, 2010, **64**, 2226-2229.
2. H. Hu, G. Zhang, L. Xiao, H. Wang, Q. Zhang and Z. Zhao, *Carbon*, 2012, **50**, 4596-4599.
3. M. Li, C. Gao, H. Hu and Z. Zhao, *Carbon*, 2013, **65**, 371-373.
4. P. Sedykh and D. Michel, *Physical Review B Condensed Matter*, 2009, **79**, 134119.
5. Y. F. Zhu, L. Zhang, T. Natsuki, Y. Q. Fu and Q. Q. Ni, *Acs Applied Materials & Interfaces*, 2012, **4**, 2101-2106.
6. N. R. Alluri, S. Selvarajan, A. Chandrasekhar, B. Saravanakumar, J. H. Jeong and S. J. Kim, *Composites Science & Technology*, 2017, **142**, 65-78.
